# Supplementary material for: Item-Level Genome-Wide Association Study of the Alcohol Use Disorders Identification Test in Three Population-Based Cohorts
Source: Atypon-hosted journal article supplement (doi:10.1176/appi.ajp.2020.20091390), 2021-05-14
Supplement: appi.ajp.2020.20091390.ds001.pdf [file appi.ajp.2020.20091390.ds001.pdf]

 


Psychiatry Online
